# Supplementary material
Source: PubMed Central journal article supplement (PMC4309550)
Supplement: NIHMS654703-supplement-Colton_et_al__Supplemental_data.pdf [file NIHMS654703-supplement-Colton_et_al__Supplemental_data.pdf]

## SUPPORTING INFORMATION

### “Developmental toxicity and DNA damage from exposure to parking lot runoff retention pond samples in the Japanese Medaka (*Oryzias latipes*)”

This supporting information provides additional results related to: 1) LA-QPCR assay optimization; 2) DNA extraction procedures optimization; and 3) PLRRP sediment PAH concentrations.

#### 1. DNA EXTRACTION OPTIMIZATION

##### MATERIALS AND METHODS

Nitrogen grinding, bullet blending, and tissue homogenization were tested as methods of homogenization prior to DNA isolation with Genomic Tips, with DNA integrity assessed by gel electrophoresis as described [Meyer 2010]. The size marker is a HindIII digest of lambda phage DNA, and the control DNA is nematode genomic DNA extracted per our previously-optimized methods [Hunter *et al.*, 2010].

##### RESULTS

Tissue homogenization generated the highest molecular weight DNA, as seen previously for fish tissues (Supplemental figure 1) [Jung *et al.*, 2009].

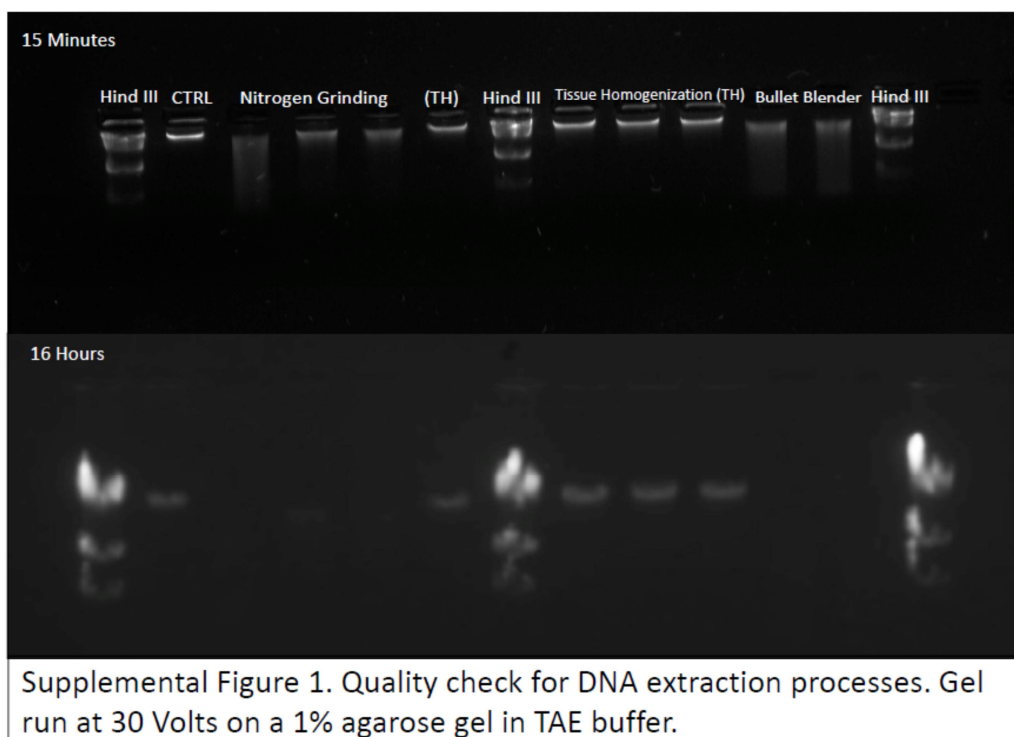

## 2. LA-QPCR OPTIMIZATION

### MATERIALS AND METHODS

Several sets of primers were tested for amplification of short and long mitochondrial and nuclear products. The short and long amplicons for the mitochondrial genome are illustrated in Supplemental Figure 2. This map of the medaka mitochondrial genome was created using OGDRAW. Numbers indicate nucleotide positions, based on GenBank accession number [NC\\_004387](https://www.ncbi.nlm.nih.gov/nuccore/NC_004387).

After primer choice and temperature optimization

(not shown), we carried out cycle tests to identify the optimal cycle number for quantitative reactions. The D loop is the region that lacks any coding sequence between tRNA-Pro and the final base (16714).

Products were visualized by gel electrophoresis (Supplemental Figures 3 and 4) and quantified by plate reader (Supplemental Figures 5 and 6).

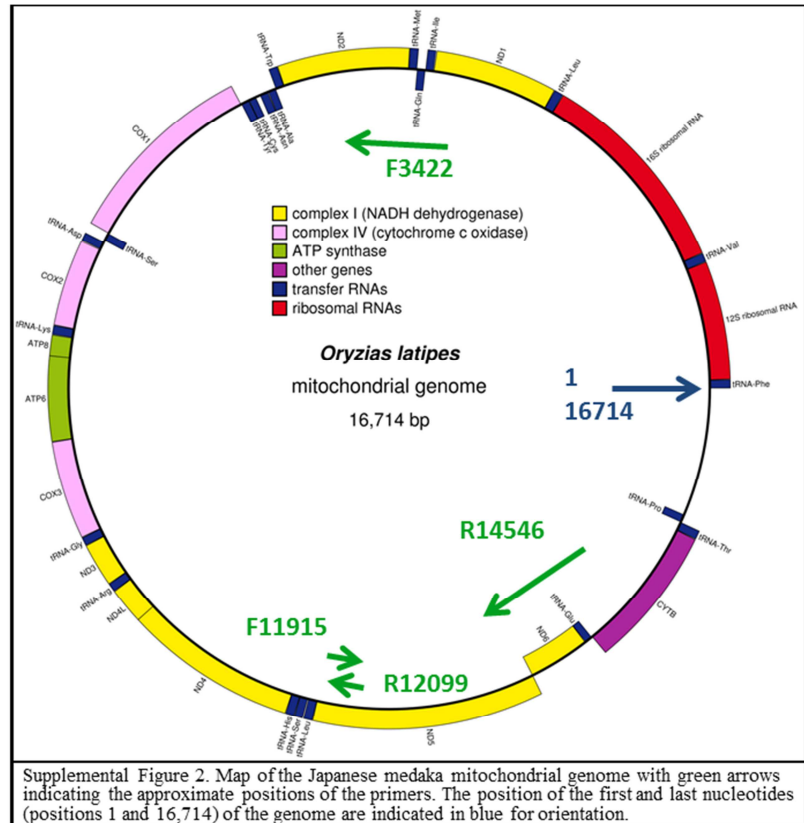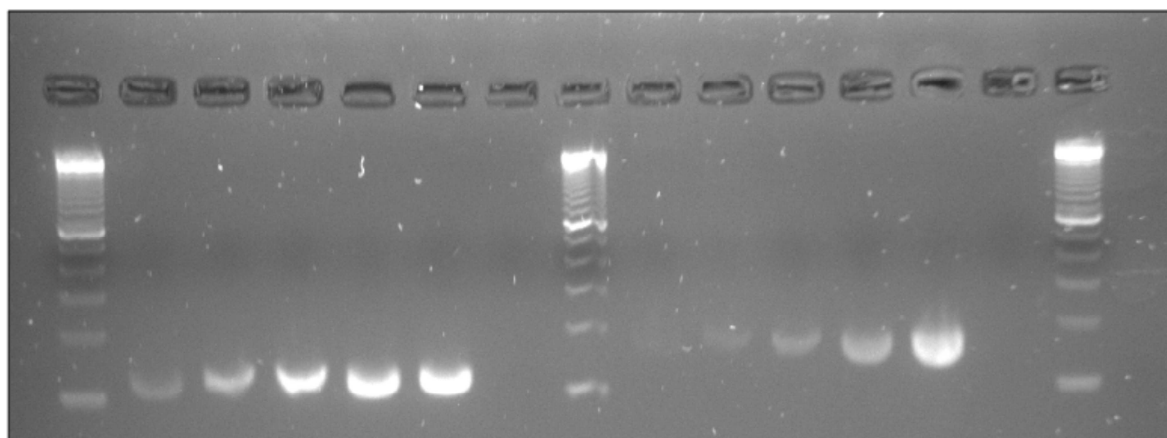

|         | Short Nuclear |    |    |    |    |       |   | Short Mitochondrial |    |    |    |    |       |   |
|---------|---------------|----|----|----|----|-------|---|---------------------|----|----|----|----|-------|---|
| Cycle # | -             | 26 | 28 | 30 | 34 | Blank | - | 21                  | 23 | 24 | 25 | 27 | blank | - |

Supplemental Figure 3. Short product cycle optimization. Gels run at 150 volts for 60 minutes on a 2% agarose gel in Sodium Borate buffer.

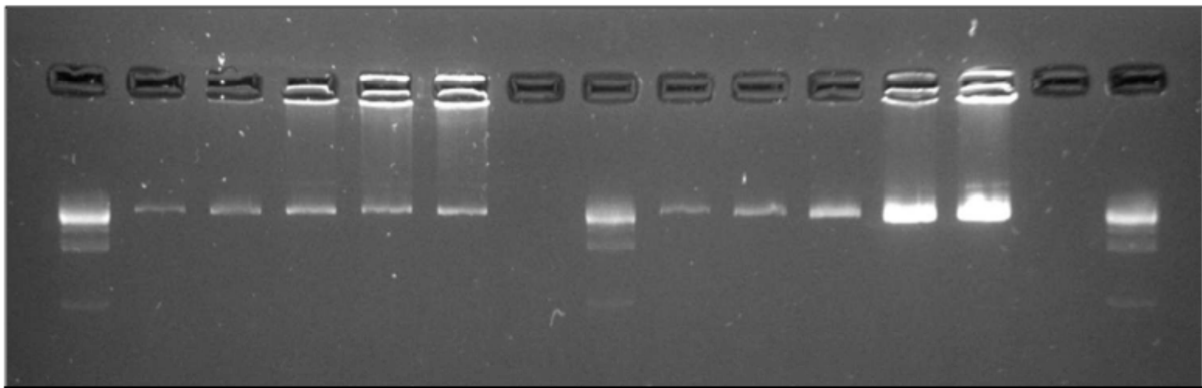

|         | Long Nuclear |    |    |    |    |       |   | Long Mitochondrial |    |    |    |    |       |   |
|---------|--------------|----|----|----|----|-------|---|--------------------|----|----|----|----|-------|---|
| Cycle # | -            | 26 | 28 | 30 | 34 | Blank | - | 19                 | 20 | 21 | 23 | 25 | blank | - |

Supplemental Figure 4. Long product cycle optimization. Gels run at 150 volts for 60 minutes on a 2% agarose gel in Sodium Borate buffer.

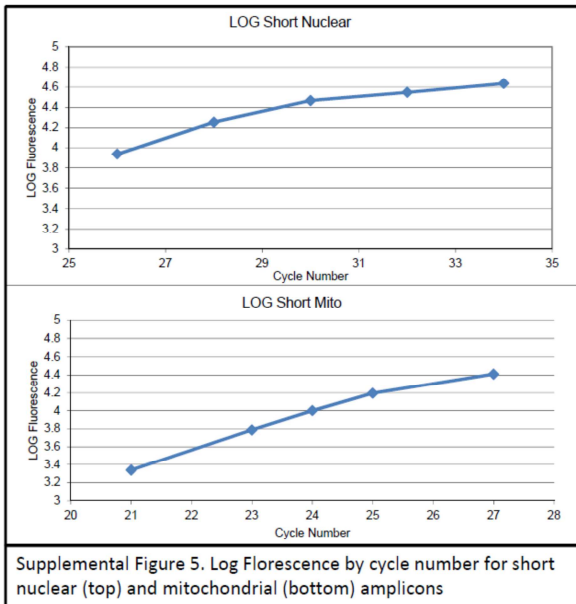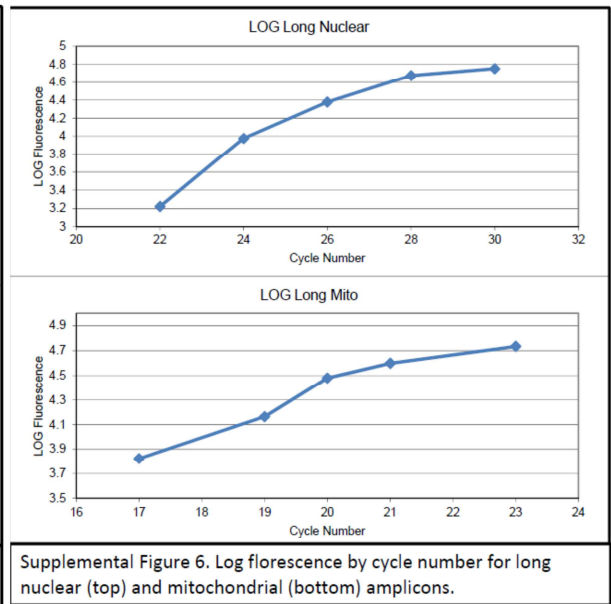

## RESULTS

Based on these analyses, typical optimal cycle numbers were determined to be 26, 27, 20, and 22 for short and long nuclear and short and long mitochondrial products, respectively.

### **3. PLRRP SEDIMENT PAH CONCENTRATIONS**

#### **MATERIALS AND METHODS**

##### **Sediment Sampling**

In May, 2009, modified 60mL syringes were used to collect fifteen sediment core samples per site. The tips of the syringes were cut off, turning them into simple tubes. These tubes were pushed into the sediment at each site, the plungers pulled up to collect sediment, and the tubes then removed from the sand. The sediment was pushed up through the tube with the plunger until only approximately two cubic centimeters of sediment remained in the syringe. This sediment was collected in glass scintillation vials, which were tightly capped and refrigerated at  $-20^{\circ}\text{C}$  until homogenization. The sediment sampling site is illustrated in Supplemental Figure 7.

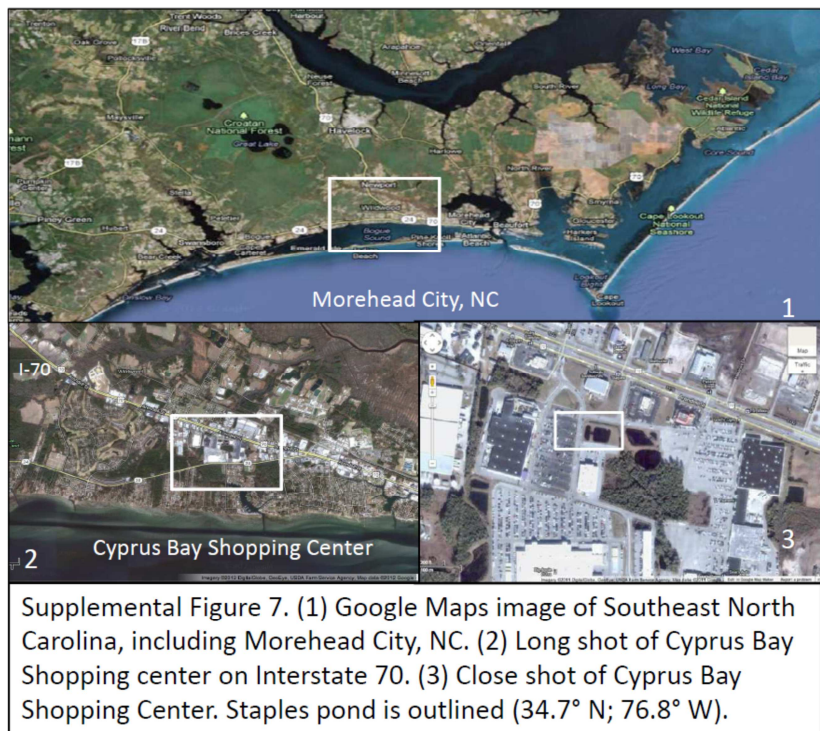

##### **Sediment Homogenization and PAH Analysis**

Sediments were first homogenized with a mortar and pestle. Sediment samples were thawed and transferred to a glass graduated cylinder, which was then filled with water to the 15mL mark and shaken. The mixture was then vacuum-filtered on pre-weighed glass fiber filter paper to remove excess water. Then, sediment and filter paper were weighed and homogenized with a stainless steel mortar and pestle. From the ground-up mixture, three aliquots of approximately 0.02g were collected and each placed into a small, labeled aluminum foil sleeve. These sleeves were then placed into an oven at  $80^{\circ}\text{C}$  overnight to achieve a value for dry weight of sediment. Of the

homogenized sediments 2.0g was weighed and placed in 10mL glass test tubes with an equal amount of anhydrous sodium sulfate.

For PAH analysis, wet sediment (approximately 1.5 g) was ground with Na<sub>2</sub>SO<sub>4</sub>, spiked with a surrogate standard mix (deuterated 2-methylnaphthalene, fluorene, fluoranthene and perylene; Cambridge Isotope Laboratories, Tewksbury, MA, USA), and extracted in 1:1 dichloromethane (DCM) and hexane (v:v) with an accelerated solvent extractor (ASE 200, Dionex, Sunnyvale, CA). Extracts were concentrated with rapid evaporation under N<sub>2</sub> (Turbo Vap, Caliper LifeSciences, Hopkinton, MA, USA ) to approximately 0.5 mL, and cleaned with column chromatography using 6% deactivated alumina (4 g) topped Na<sub>2</sub>SO<sub>4</sub> with eluting with 50 mL 1:1 DCM/hexane. Purified extracts were concentrated under N<sub>2</sub> with HCl-cleaned copper turnings to remove sulfur, and spiked with an internal standard mix (deuterated naphthalene, phenanthrene, pyrene and benzo[a]pyrene; Cambridge Isotope Laboratories) for quantitation. PAHs were analyzed using a gas chromatograph and mass spectrometer (Agilent GC 6890N, MS 5975, Newark, DE) using electron ionization and selected ion monitoring. Analytes were injected (splitless, 250°C) onto a DB-5 column (30 m, 250 µm nominal diameter, 0.25 µm film thickness; J&W Scientific, Agilent) and separate using a thermal gradient (40°C for 0.6 min, increase to 280°C over 14.6 min, hold at 280°C for 24 min). Recoveries of surrogate standards were 62-101% with the exception of 2-methylnaphthalene, for which recoveries were near 16%. Sediment moisture content was measured gravimetrically by weighing approximately 1.5-2.0 g wet sediment before and after drying at 105°C for 16 hours. Moisture content was calculated as (moist weight – dry weight)/dry weight, and used to correct PAH concentrations to dry weight.

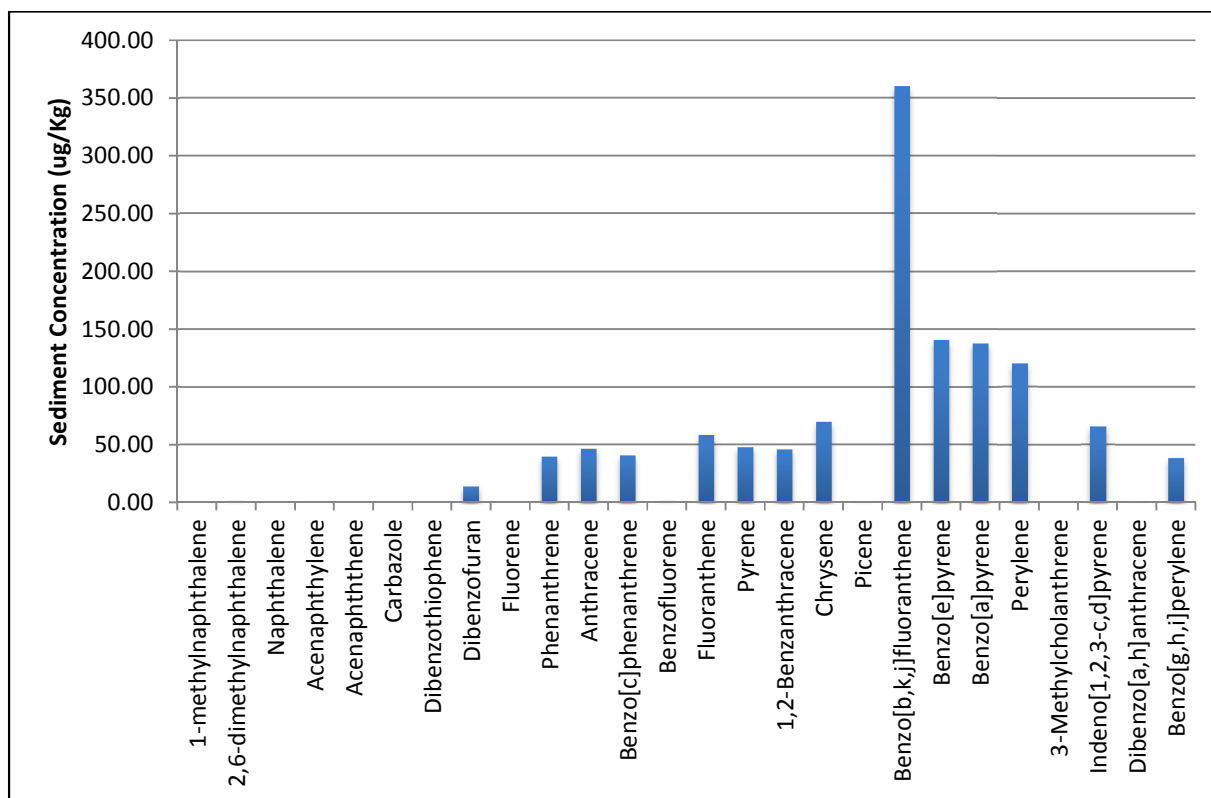

Supplemental Figure 8. PAH concentrations in parking lot runoff retention pond.

## RESULTS

Sediment PAH concentrations are presented in Supplemental Figure 8.

## REFERENCES

Hunter, S.E., Jung, D., Di Giulio, R.T., Meyer, J.N., 2010. The QPCR assay for analysis of mitochondrial DNA damage, repair, and relative copy number. *Methods* 51, 444-451.

Jung, D., Cho, Y., Meyer, J.N., Di Giulio, R.T., 2009. The long amplicon quantitative PCR for DNA damage assay as a sensitive method of assessing DNA damage in the environmental model, Atlantic killifish (*Fundulus heteroclitus*). *Comp. Biochem. Phys. C* 149, 182-186.

Meyer, J. N., 2010. QPCR: a tool for analysis of mitochondrial and nuclear DNA damage in ecotoxicology. *Ecotoxicology* 19, 804-811.
